# Supplementary material for: A green procedure for the regio- and chemoselective hydrophosphonylation of unsaturated systems using CaO under solventless conditions
Source: Royal Society of Chemistry journal article supplement (doi:10.1039/c0gc00026d), 2010-01-01
Supplement: c0gc00026d.pdf [file c0gc00026d.pdf]

## A green procedure for the regio and chemoselective hydrophosphonylation of organic unsaturated systems using CaO under solventless conditions.

Elisa Martínez-Castro,<sup>a</sup> Óscar López,<sup>a</sup> Inés Maya,<sup>a</sup> José G. Fernández-Bolaños\*<sup>a</sup>

<sup>a</sup>*Departamento de Química Orgánica, Facultad de Química, Universidad de Sevilla, Apartado 1203, E-41071 Seville, Spain. E-mail: bolanos@us.es*

Marino Petrini\*<sup>b</sup>

<sup>b</sup>*School of Science and Technology, Chemistry Division, Università di Camerino, Via S. Agostino 1, 62032 Camerino, Italy. E-mail: marino.petrini@unicam.it*

### Supporting Information

#### General Remarks

<sup>1</sup>H (400 MHz) and <sup>13</sup>C (100 MHz) NMR spectra were recorded on a Varian Mercury Plus 400 instrument. <sup>1</sup>H (300 and 500 MHz) and <sup>13</sup>C (75.5 and 125.8 MHz) NMR spectra were recorded on Bruker Avance-300 and Avance-500 spectrometers. The assignments of <sup>1</sup>H and <sup>13</sup>C signals were confirmed by homonuclear COSY and heteronuclear 2D correlated spectra, respectively. GC-MS analyses were carried out by using the EI technique (70 eV) with a GC-MS Agilent Technologies 6850 SerieII/5973 Inert instrument. Mass spectra (CI and LSI) were recorded on Micromass AutoSpec-Q mass spectrometers with a resolution of 1,000 or 10,000 (10% valley definition). For LSI spectra, ions were produced by a beam of Cs<sup>+</sup> ions, respectively, using thioglycerol as matrix and NaI as additive. IR spectra were recorded with a Perkin-Elmer Paragon 500 FTIR. TLC was performed on aluminium pre-coated sheets (E. Merck Silica Gel 60 F<sub>254</sub>); spots were visualized by UV light, by charring with 10% H<sub>2</sub>SO<sub>4</sub> in EtOH. Column chromatography was performed using E. Merck Silica Gel 60 (40–63 mm). Calcium oxide (Aldrich) was used as received.

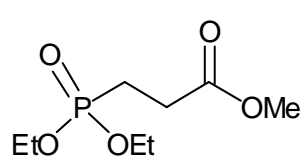**Methyl 3-(diethoxyphosphinyl)propanoate (9).**<sup>1</sup> The crude product was purified by column chromatography (2:1 hexane–EtOAc → 1:2 hexane–EtOAc) to give **9**: 90 mg, 80%; IR  $\nu_{\max}$  3461, 2985, 1742, 1394, 1367, 1026, 971 cm<sup>-1</sup>; <sup>1</sup>H-NMR (400 MHz, CDCl<sub>3</sub>)  $\delta$  4.08, 4.04 (2 ddq, 2H, <sup>2</sup>J<sub>H,H</sub> = 10.4 Hz, <sup>3</sup>J<sub>P,H</sub> = 8.4 Hz, <sup>3</sup>J<sub>H,H</sub> = 7.2 Hz, CH<sub>2</sub>CH<sub>3</sub>), 3.65 (s, 3H, OMe), 2.55 (m, 2H, CH<sub>2</sub>P), 2.03 (m, 2H, CH<sub>2</sub>CO), 1.27 (t, 6H, 2CH<sub>2</sub>CH<sub>3</sub>) ppm; <sup>13</sup>C-NMR (100 MHz, CDCl<sub>3</sub>)  $\delta$  172.6 (d, <sup>3</sup>J<sub>C,P</sub> = 18.2 Hz, CO), 61.8 (d, <sup>2</sup>J<sub>C,P</sub> = 6.5 Hz, CH<sub>2</sub>CH<sub>3</sub>), 52.1 (OMe), 27.4 (d, <sup>2</sup>J<sub>C,P</sub> = 4.0 Hz,

<sup>1</sup> Y. Okamoto and H. Sakurai, *Synthesis* 1982, 497–499.

CH<sub>2</sub>CO), 21.1 (d, <sup>1</sup>J<sub>C,P</sub>=143.2 Hz, CH<sub>2</sub>P), 16.5 (d, <sup>3</sup>J<sub>C,P</sub>=5.3 Hz, 2CH<sub>2</sub>CH<sub>3</sub>) ppm; GC-MS (70 eV): *m/z*: 224 (M<sup>+</sup>), 193, 179, 165, 151, 137 (100), 123, 109, 95.

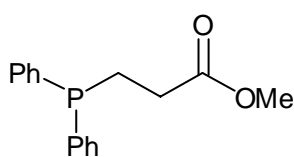

**Methyl 3-(diphenylphosphino)propanoate (10).**<sup>2</sup> The crude product was purified by column chromatography (2:1 hexane–EtOAc → 1:2 hexane–EtOAc) to give **10**: 132 mg, 49%; IR  $\nu_{\max}$  3053, 2950, 2361, 1738, 1434, 1355, 1224, 1166, 739 cm<sup>-1</sup>; <sup>1</sup>H-NMR (400 MHz, CDCl<sub>3</sub>)  $\delta$  7.45–7.33 (m, 5H, Ar-H), 3.65 (s, 3H, CH<sub>3</sub>), 2.44–2.33 (m, 4H CH<sub>2</sub>P, CH<sub>2</sub>CO) ppm; <sup>13</sup>C-NMR (100 MHz, CDCl<sub>3</sub>)  $\delta$  173.8 (d, <sup>3</sup>J<sub>C,P</sub>= 15.0 Hz, C=O), 138.0, 132.9, 129.1, 128.8 (Ar), 52.0 (OMe), 30.8 (d, 1C, <sup>1</sup>J<sub>C,P</sub>= 18.9 Hz, CH<sub>2</sub>P), 23.2 (d, <sup>2</sup>J<sub>C,P</sub>= 12.2 Hz, CH<sub>2</sub>CO) ppm; GC-MS (70 eV): *m/z*: 272 (M<sup>+</sup>), 257 (100), 241, 201, 183, 152, 133, 107.

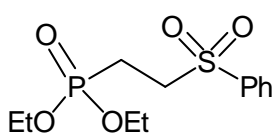

**Diethyl 2-(phenylsulfonyl)ethylphosphonate (11).**<sup>3</sup> The crude product was purified by column chromatography (2:1 hexane–EtOAc → 1:2 hexane–EtOAc) to give **11**: 279 mg, 91%; IR  $\nu_{\max}$  3468, 2929, 1150, 1023, 783 cm<sup>-1</sup>; <sup>1</sup>H-NMR (400 MHz, CDCl<sub>3</sub>)  $\delta$  7.91–7.89 (m, 2H, Ar-H), 7.70–7.68 (m, 1H, Ar-H), 7.61–7.56 (m, 2H, Ar-H), 4.13–4.00 (m, 4H, 2CH<sub>2</sub>CH<sub>3</sub>), 3.31–3.25 (m, 2H, CH<sub>2</sub>SO<sub>2</sub>), 2.17–2.08 (m, 2H, CH<sub>2</sub>P), 1.29 (t, 6H, <sup>3</sup>J<sub>H,H</sub>= 6.8 Hz, 2 CH<sub>2</sub>CH<sub>3</sub>) ppm; <sup>13</sup>C-RMN (100 MHz, CDCl<sub>3</sub>)  $\delta$  138.3, 134.4, 129.7, 128.4 (Ar-C), 62.3 (d, <sup>2</sup>J<sub>C,P</sub>= 6.4 Hz, 2CH<sub>2</sub>CH<sub>3</sub>), 50.2 (d, <sup>2</sup>J<sub>C,P</sub>= 3.4 Hz, CH<sub>2</sub>SO<sub>2</sub>), 19.6 (d, <sup>1</sup>J<sub>C,P</sub>= 142.5 Hz, CH<sub>2</sub>P), 16.3 (d, <sup>3</sup>J<sub>C,P</sub>= 5.9 Hz, 2CH<sub>2</sub>CH<sub>3</sub>) ppm; GC-MS (70 eV): *m/z*: 307 ([M+H]<sup>+</sup>), 261, 242, 214, 174, 165, 138, 121, 109 (100), 91.

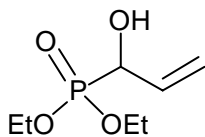

**Diethyl (1-hydroxyallyl)phosphonate (12).**<sup>4</sup> The crude product was purified by column chromatography (2:1 hexane–EtOAc → 1:2 hexane–EtOAc) to give **12**: 160 mg, 82%; IR  $\nu_{\max}$  3306, 2985, 1239, 1026, 971 cm<sup>-1</sup>; <sup>1</sup>H-RMN (400 MHz, CDCl<sub>3</sub>)  $\delta$  5.98 (m, 1H, H-2), 5.47 (ddt, 1H, <sup>4</sup>J<sub>1,3a</sub> = <sup>2</sup>J<sub>3a,3b</sub> = 1.6 Hz, <sup>3</sup>J<sub>2,3a</sub> = 16.8 Hz, <sup>4</sup>J<sub>H3a,P</sub> = 5.0 Hz, H-3a), 5.28 (ddt, 1H, <sup>4</sup>J<sub>1,3b</sub> = 1.6 Hz, <sup>2</sup>J<sub>3b,3a</sub> = 1.6 Hz, <sup>3</sup>J<sub>2,3b</sub> = 10.8 Hz, <sup>4</sup>J<sub>H3b,P</sub> = 3.6 Hz, H-3b), 4.50 (tt, 1H, <sup>3</sup>J<sub>OH,H</sub> = <sup>2</sup>J<sub>P,H</sub> = 6.0 Hz, H-1), 4.45 (m, 1H, OH), 4.19–4.11 (m, 4H, 2CH<sub>2</sub>CH<sub>3</sub>), 1.30, 1.29 (2t, 3H each, <sup>3</sup>J<sub>H,H</sub> = 7.0 Hz, 2CH<sub>2</sub>CH<sub>3</sub>) ppm; <sup>13</sup>C-RMN (100 MHz, CDCl<sub>3</sub>)  $\delta$  133.0 (d, <sup>2</sup>J<sub>C,P</sub>= 3.8 Hz, C-2), 117.2 (d, <sup>3</sup>J<sub>C,P</sub>= 12.9 Hz, C-3), 69.7 (d, <sup>1</sup>J<sub>C,P</sub>=159.1 Hz, C-1), 63.4 (d, <sup>2</sup>J<sub>C,P</sub>= 6.8 Hz, 2CH<sub>2</sub>CH<sub>3</sub>), 16.7 (d, <sup>3</sup>J<sub>C,P</sub>= 6.0 Hz, 2CH<sub>2</sub>CH<sub>3</sub>) ppm; GC-MS (70 eV): *m/z*: 194 (M<sup>+</sup>), 165, 138, 121, 111, 99, 91, 82 (100), 65.

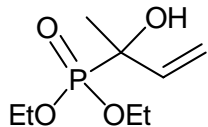

**Diethyl (1-hydroxy-1-methylallyl)phosphonate (13).**<sup>5</sup> The crude product was purified by column chromatography (2:1 hexane–EtOAc → 1:2 hexane–EtOAc) to give **13**: 179 mg, 87%. Reaction carried out with 10 mmol of methyl vinyl ketone **4** 10 mmol of diethyl phosphite and 10 mmol of CaO at room temperature for 5 h gave 1.54 g (74%) of **13**. <sup>1</sup>H-NMR (300 MHz, CDCl<sub>3</sub>)  $\delta$  5.99 (ddd, 1H, <sup>3</sup>J<sub>2,3a</sub> = 17.4 Hz, <sup>3</sup>J<sub>2,3b</sub> = 10.8 Hz, <sup>3</sup>J<sub>2,P</sub> = 3.9 Hz, H-2), 5.42 (ddd, 1H, <sup>2</sup>J<sub>3a,3b</sub> = 1.1 Hz, <sup>4</sup>J<sub>3a,P</sub> = 5.0 Hz, H-3a), 5.20 (dd, 1H, <sup>4</sup>J<sub>3b,P</sub> = 3.9 Hz, H-3b), 4.13 (quint, 2H, <sup>3</sup>J<sub>H,H</sub> = <sup>3</sup>J<sub>H,P</sub> = 7.1 Hz, CH<sub>2</sub>CH<sub>3</sub>), 4.12 (quint, 2H, <sup>3</sup>J<sub>H,H</sub> =

<sup>2</sup> M. Riondato, D. Camporese, D. Martín, J. Suades, A. Álvarez-Larena and U. Mazzi, *Eur. J. Inorg. Chem.*, 2005, 4048–4055.

<sup>3</sup> D. R. Marshall, P. J. Thomas, C. J. M. Stirling, *J. Chem. Soc., Perkin Trans. 2*, 1977, 1898–909.

<sup>4</sup> G. M. Blackburn and D. E. Kent, *J. Chem. Soc., Perkin Trans. 1*, 1986, 913–917.

<sup>5</sup> G. Keglevich, M. Sipos, D. Takács, I. Greiner, *Heteroatom Chem.* 2007, **18**, 226–229.

$^3J_{\text{H,P}} = 7.1$  Hz,  $\text{CH}_2\text{CH}_3$ ), 3.77 (bs, 1H, OH), 1.48 (d, 3H,  $^3J_{\text{H,P}} = 5.9$  Hz,  $\text{CH}_3\text{COH}$ ), 1.29 (t, 3H,  $\text{CH}_2\text{CH}_3$ ), 1.28 (t, 3H,  $\text{CH}_2\text{CH}_3$ ) ppm;  $^{13}\text{C}$ -RMN (75.5 MHz,  $\text{CDCl}_3$ )  $\delta$  138.3 (C-2), 115.1 (d,  $^3J_{\text{C,P}} = 9.8$  Hz, C-3), 72.9 (d,  $^1J_{\text{C,P}} = 160.3$  Hz, C-1), 63.5 (d,  $^2J_{\text{C,P}} = 7.4$  Hz,  $\text{CH}_2\text{CH}_3$ ), 63.3 (d,  $^2J_{\text{C,P}} = 7.5$  Hz,  $\text{CH}_2\text{CH}_3$ ), 23.6 (d,  $^2J_{\text{C,P}} = 0.9$  Hz,  $\text{CH}_3\text{C}(\text{OH})$ ), 16.6, 16.5 (2d,  $^3J_{\text{C,P}} = 5.6$  Hz,  $\text{CH}_2\text{CH}_3$ ) ppm; EIMS  $m/z$  208 ( $\text{M}^+$ , 1%); HREI-MS  $m/z$  calcd for  $\text{C}_8\text{H}_{17}\text{O}_4\text{P}$ ,  $\text{M}^+$ : 208.0864, found: 208.0862.

### Reaction of methyl vinyl ketone **4** and diethyl phosphite at 60 °C.

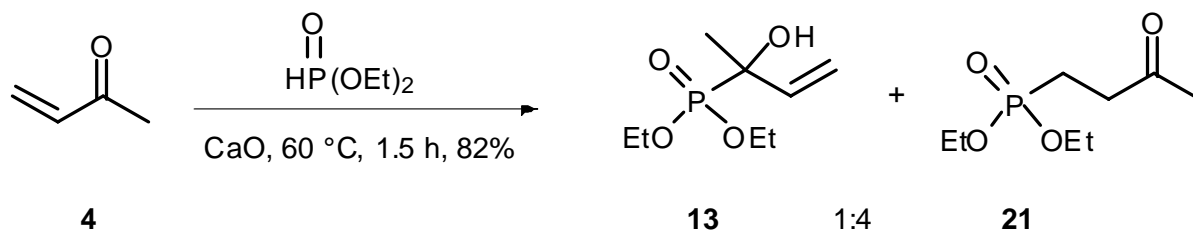

To a mixture of compound **4** (1 mmol) and diethyl phosphite (1 mmol) was added calcium oxide (1 mmol). The corresponding mixture was stirred at 60 °C for 1.5 h, and after cooling EtOAc was added, and the suspension was filtered through a Celite pad. The filtrate was concentrated to dryness and purified by column chromatography to give a mixture of compounds **13** and **21** as a 1:4 regioisomeric mixture in 82% yield.  $^1\text{H}$ -NMR (300 MHz,  $\text{CDCl}_3$ ) for **21**<sup>6</sup>:  $\delta$  4.10 (m, 4H,  $\text{CH}_2\text{CH}_3$ ), 2.74 (m, 2H,  $\text{CH}_2\text{P}$ ), 2.18 (s, 3H,  $\text{CH}_3$ ), 2.03 (m, 2H,  $\text{CH}_2\text{CO}$ ), 1.33 (t, 6H,  $^3J_{\text{H,H}} = 7.1$  Hz,  $\text{CH}_2\text{CH}_3$ ).

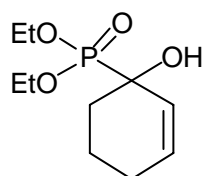

**Diethyl (1-hydroxycyclohex-2-enyl)phosphonate (14)**.<sup>7</sup> The mixture was stirred for 48 h, and the product was purified by column chromatography (2:1 hexane–EtOAc  $\rightarrow$  1:2 hexane–EtOAc) to give **14**: 182 mg, 78%;  $^1\text{H}$ -RMN (300 MHz,  $\text{CDCl}_3$ )  $\delta$  6.08 (dt, 1H,  $^3J_{\text{H}_2,\text{H}_3} = 10.0$  Hz,  $^3J_{\text{H,P}} = 3.8$  Hz, H-2), 5.85 (ddt, 1H,  $^3J_{\text{H}_3,\text{H}_4} = 2.0$  Hz,  $^4J_{\text{H,P}} = 9.4$  Hz, H-3), 4.19 (m, 4H,  $2\text{CH}_2\text{CH}_3$ ), 3.38 (d, 1H,  $^3J_{\text{OH,P}} = 4.1$  Hz, OH), 2.13–1.70 (m, 6H,  $3\text{CH}_2$ ), 1.34, 1.32 (2t, 3H each,  $^3J_{\text{H,H}} = 7.0$  Hz,  $2\text{CH}_2\text{CH}_3$ ) ppm;  $^{13}\text{C}$ -RMN (75.5 MHz,  $\text{CDCl}_3$ )  $\delta$  134.5 (d,  $^2J_{\text{C}_2,\text{P}} = 11.1$  Hz, C-2), 125.5 (s, C-3), 69.5 (d,  $^1J_{\text{C}_1,\text{P}} = 165.8$  Hz, C-1), 63.3 (d,  $^2J_{\text{C,P}} = 7.3$  Hz,  $2\text{CH}_2\text{CH}_3$ ), 31.1 (d,  $^2J_{\text{C,P}} = 3.0$  Hz, C-6), 25.1 (d,  $^4J_{\text{C,P}} = 1.0$  Hz, C-4), 17.7 (d,  $^3J_{\text{C,P}} = 7.3$  Hz, C-5), 16.7 (d,  $^3J_{\text{C,P}} = 5.3$  Hz,  $2\text{CH}_2\text{CH}_3$ ) ppm; LSIMS  $m/z$  257 ( $[\text{M}+\text{Na}]^+$ , 8%); HRLSI-MS  $m/z$  calcd for  $\text{C}_{10}\text{H}_{19}\text{O}_4\text{PNa}$ ,  $[\text{M}+\text{Na}]^+$ : 257.0919, found: 257.0906.

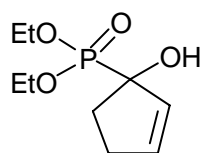

**Diethyl (1-hydroxycyclopent-2-enyl)phosphonate (15)**.<sup>4</sup> The crude product was purified by column chromatography (2:1 hexane–EtOAc  $\rightarrow$  1:2 hexane–EtOAc) to give **15**: 148 mg, 67%.  $^1\text{H}$ -NMR (300 MHz,  $\text{CDCl}_3$ )  $\delta$  6.05 (m, 1H, H-2), 5.74 (dt, 1H,  $^3J_{\text{H}_2,\text{H}_3} = 7.7$ ,  $^3J_{\text{H,H}} = 2.1$  Hz, H-3), 4.18–4.02 (m, 4H,  $2\text{CH}_2\text{CH}_3$ ), 3.86 (bs, 1H, OH), 2.59–2.44 (m, 2H,  $2\text{CH}$ ), 2.41–2.27 (m, 1H,  $\text{CH}$ ), 1.93–1.79 (m, 1H,  $\text{CH}$ ), 1.26 (t, 3H,  $^3J_{\text{H,H}} = 7.0$  Hz,  $2\text{CH}_2\text{CH}_3$ ), 1.24 (t, 3H,  $^3J_{\text{H,H}} = 7.0$  Hz,  $2\text{CH}_2\text{CH}_3$ ) ppm;  $^{13}\text{C}$ -RMN (75.5 MHz,  $\text{CDCl}_3$ )  $\delta$  138.0 (d,  $^2J_{\text{C,P}} = 13.3$  Hz, C-2), 130.9 (d,  $^3J_{\text{C,P}} = 1.3$  Hz, C-3), 83.5 (d,  $^1J_{\text{C,P}} = 169.9$  Hz, C-

<sup>6</sup> C. A. Verbicky and C. K. Zercher, *J. Org. Chem.* 2000, **65**, 5615–5622.

<sup>7</sup> M. Attolini, F. Bouguir, G. Iacazio, G. Peiffera and M. Maffei, *Tetrahedron* 2001, **57**, 537–543.

1), 63.2 (d,  $^2J_{C,P}$  = 7.1 Hz, CH<sub>2</sub>CH<sub>3</sub>), 63.1 (d,  $^2J_{C,P}$  = 7.3 Hz, CH<sub>2</sub>CH<sub>3</sub>), 34.9 (d,  $J_{C,P}$  = 7.1 Hz, CH<sub>2</sub>), 32.1 (d,  $J_{C,P}$  = 5.1 Hz, CH<sub>2</sub>), 16.7 (d,  $^3J_{C,P}$  = 1.0 Hz, CH<sub>2</sub>CH<sub>3</sub>), 16.6 (d,  $^3J_{C,P}$  = 1.0 Hz, CH<sub>2</sub>CH<sub>3</sub>) ppm; CI-MS  $m/z$  221 ([M+H]<sup>+</sup>, 15%); HRCl-MS  $m/z$  calcd for C<sub>9</sub>H<sub>18</sub>O<sub>4</sub>P, [M+H]<sup>+</sup>: 221.0943, found: 221.0946.

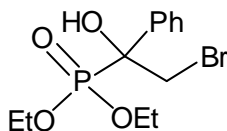

**Diethyl (2-bromo-1-hydroxy-1-phenylethyl)phosphonate (16).**<sup>8</sup> The crude product was purified by column chromatography (2:1 hexane–EtOAc → 1:2 hexane–EtOAc) to give **16**: 290 mg, 86%; <sup>1</sup>H-RMN (300 MHz, CDCl<sub>3</sub>) δ 7.61–7.57 (m, 2H, Ar-H), 7.43–7.31 (m, 3H, Ar-H), 4.20–4.08 (m, 4H, CH<sub>2</sub>CH<sub>3</sub>, CH<sub>2</sub>Br), 3.96 (ddq, 1H,  $^2J_{H,H}$  = 10.1 Hz,  $^3J_{H,P}$  = 8.0 Hz,  $^3J_{H,H}$  = 7.1 Hz, CH<sup>A</sup>CH<sub>3</sub>), 3.79 (ddq, 1H,  $^3J_{H,H}$  = 7.1 Hz,  $^3J_{H,P}$  = 8.2 Hz, CH<sup>B</sup>CH<sub>3</sub>), 3.45 (d, 1H,  $^3J_{OH,P}$  = 15.2 Hz, OH), 1.29, 1.16 (2t, 3H each, 2CH<sub>2</sub>CH<sub>3</sub>) ppm; <sup>13</sup>C-RMN (75.5 MHz, CDCl<sub>3</sub>) δ 137.4, 128.4, 126.4(x2) (Ar), 75.3 (d,  $^1J_{C,P}$  = 112.7 Hz, C-1), 64.3 (d,  $^2J_{C,P}$  = 7.5 Hz CH<sub>2</sub>CH<sub>3</sub>), 64.0 (d,  $^2J_{C,P}$  = 7.6 Hz, CH<sub>2</sub>CH<sub>3</sub>), 40.7 (d,  $^2J_{C,P}$  = 15.3 Hz, CH<sub>2</sub>Br), 16.5, 16.4 (2d,  $^3J_{C,P}$  = 5.7 Hz, 2 CH<sub>2</sub>CH<sub>3</sub>) ppm; LSIMS  $m/z$  359 ([M+Na]<sup>+</sup>, 100 %); HRLSI-MS  $m/z$  calcd for C<sub>12</sub>H<sub>18</sub>BrNaO<sub>4</sub>P, [M+Na]<sup>+</sup>: 359.0024, found: 359.0020.

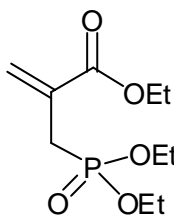

**Methyl 2-[(diethoxyphosphinyl)methyl]acrylate (17).**<sup>9</sup> The crude product was purified by column chromatography (2:1 hexane–EtOAc → 1:2 hexane–EtOAc) to give **17**: 225 mg, 90%; IR  $\nu_{max}$  3480, 2984, 1633, 1257, 1027, 966 cm<sup>-1</sup>; <sup>1</sup>H-RMN (400 MHz, CDCl<sub>3</sub>) δ 6.25 (dt, 1H,  $^2J_{H,H}$  = 5.6 Hz,  $J_{1,3a}$  = 0.8 Hz, H-3a), 5.75 (dt, 1H,  $J_{1,3b}$  = 0.8 Hz, H-3b), 4.12 (q, 2H,  $^3J_{H,H}$  = 6.8 Hz, CH<sub>2</sub>OCO), 3.99 (m, 4H, 2CH<sub>2</sub>OP), 2.84 (dt,  $^2J_{H,P}$  = 22.0 Hz, CH<sub>2</sub>P), 1.21, 1.19 (x2) (4t, 3H each,  $^3J_{H,H}$  = 7.2 Hz, 4CH<sub>3</sub>) ppm; <sup>13</sup>C-RMN (100 MHz, CDCl<sub>3</sub>) δ 166.1 (d,  $^3J_{C,P}$  = 5.7 Hz, CO), 131.5 (d,  $^2J_{C,P}$  = 10.6 Hz, C-2), 128.5 (d,  $^3J_{C,P}$  = 9.9 Hz, C-3), 62.0 (d,  $^2J_{C,P}$  = 6.0 Hz, 2CH<sub>2</sub>OP), 61.2 (s, CH<sub>2</sub>OCO), 28.4 (d,  $^1J_{C,P}$  = 138.6 Hz, C-1), 16.3 (d,  $^3J_{C,P}$  = 6 Hz, 2CH<sub>3</sub>CH<sub>2</sub>OP), 14.2 (s, CH<sub>3</sub>CH<sub>2</sub>OCO) ppm; GC-MS (70 eV):  $m/z$ : 250 (M<sup>+</sup>), 221, 205, 193, 177, 149, 121, 109, 81, 68 (100).

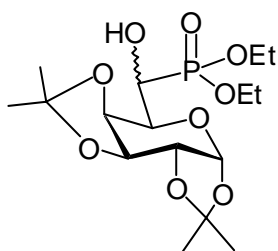

**6-C-(Diethoxyphosphinyl)-1,2:3,4-di-O-isopropylidene-α-D-galactopyranose (20).** The crude product was purified by column chromatography (1:1 hexane–EtOAc → 1:2 hexane–EtOAc) to give **20**: 277 mg, 70%; <sup>1</sup>H-RMN (500 MHz, CDCl<sub>3</sub>) major diastereoisomer δ 5.54 (d, 1H,  $J_{1,2}$  = 5.0 Hz, H-1), 4.63 (m, 2H, H-3, H-4), 4.31 (dd, 1H,  $J_{2,3}$  = 2.0 Hz, H-2), 4.21, 4.18 (2 quint, 2H each, 2CH<sub>2</sub>CH<sub>3</sub>), 4.15 (m, 1H,  $^2J_{6,P}$  = 6.5 Hz, H-6), 4.11 (t, 1H,  $J_{5,6}$  =  $^3J_{H5,P}$  = 6.0 Hz, H-5), 3.60 (t, 1H,  $J_{OH,H-6}$  = 6.5 Hz,  $^3J_{OH,P}$  = 5.2 Hz, OH), 1.53, 1.47, 1.35, 1.31 (4 s, 3H each, 4 CH<sub>3</sub>C), 1.33, 1.32 (2t, 3H each,  $^3J_{H,H}$  = 6.9 Hz, 2CH<sub>2</sub>CH<sub>3</sub>) ppm; minor diastereoisomer δ 5.57 (d, 1H,  $J_{1,2}$  = 5.0 Hz, H-1), 4.60 (dd, 1H,  $J_{2,3}$  = 2.2 Hz,  $J_{3,4}$  = 7.6 Hz, H-3), 4.43 (bd, 1H, H-4), 4.26 (dd, 1H,  $J_{5,6}$  = 4.8 Hz,  $^2J_{6,P}$  = 9.1 Hz, H-6), 4.27, 4.11 (2m, 2H each, 2CH<sub>2</sub>), 4.21 (m, 1H, H-5), 3.28 (d, 1H,  $J_{OH,P}$  = 24.0 Hz, OH), 1.56, 1.4.6 (2s, 3H each, 2 CH<sub>3</sub>C), 1.35–1.31 (m, 6H, 2CH<sub>2</sub>CH<sub>3</sub>) ppm; <sup>13</sup>C-RMN (75.5 MHz, CDCl<sub>3</sub>) major diastereoisomer δ 109.8, 109.1 (Me<sub>2</sub>C), 96.6 (C-1), 72.0 (d,  $^3J_{C,P}$  = 6.4 Hz, C-4), 70.9 (C-3), 70.6 (C-2), 69.0 (d,  $^1J_{C,P}$  = 161.7 Hz, C-6), 65.9 (d,  $^2J_{C,P}$  = 7.8 Hz, C-5), 63.2 (d,  $^2J_{C,P}$  = 6.9 Hz,

<sup>8</sup> G. Keglevich, I. Petnehazy, L. Toke, H. R. Hudson, *Phosphorus, Sulfur Relat. Elem.*, 1987, **29**, 341–349.

<sup>9</sup> H. Mrabet and H. Zantour, *Phosphorus, Sulfur, and Silicon* 2004, **179**, 25–33.

CH<sub>2</sub>CH<sub>3</sub>), 62.8 (d, <sup>2</sup>J<sub>C,P</sub>= 6.9 Hz, CH<sub>2</sub>CH<sub>3</sub>), 26.1, 26.0, 25.1, 24.4 ((CH<sub>3</sub>)<sub>2</sub>C), 16.6 (d, <sup>3</sup>J<sub>C,P</sub>= 5.7 Hz, 2CH<sub>2</sub>CH<sub>3</sub>) ppm; minor diastereoisomer δ 109.8 (Me<sub>2</sub>C), 96.5 (C-1), 73.4 (d, <sup>3</sup>J<sub>C,P</sub>= 8.8 Hz, C-4), 71.0 (C-3), 70.9 (C-2), 68.4 (d, <sup>1</sup>J<sub>C,P</sub>= 169.5 Hz, C-6), 66.0 (d, <sup>2</sup>J<sub>C,P</sub>= 2.9 Hz, C-5), 63.6 (d, <sup>2</sup>J<sub>C,P</sub>= 6.2 Hz, CH<sub>2</sub>CH<sub>3</sub>), 62.6 (d, <sup>2</sup>J<sub>C,P</sub>= 6.1 Hz, CH<sub>2</sub>CH<sub>3</sub>), 26.1, 26.0 ((CH<sub>3</sub>)<sub>2</sub>C), 16.5 (d, <sup>3</sup>J<sub>C,P</sub>= 6.4 Hz, 2 CH<sub>2</sub>CH<sub>3</sub>) ppm; LSIMS *m/z* 419 ([M+Na]<sup>+</sup>, 100%), 397 ([M+H]<sup>+</sup>, 50%); HRLSI-MS *m/z* calcd for C<sub>16</sub>H<sub>29</sub>O<sub>9</sub>NaP [M+Na]<sup>+</sup>: 419.1447, found: 419.1466.
